# Supplementary figures and images for: Cross talk between ABC transporter mRNAs via a target mRNA-derived sponge of the GcvB small RNA
Source: PubMed Central journal article supplement — EMBO J. 2015 Jan 28;34(11):1478–92. doi: 10.15252/embj.201490546 (PMC4474525; doi:10.15252/embj.201490546), 2015-01-28

Figure 2A

Miyakoshi et al., 2014

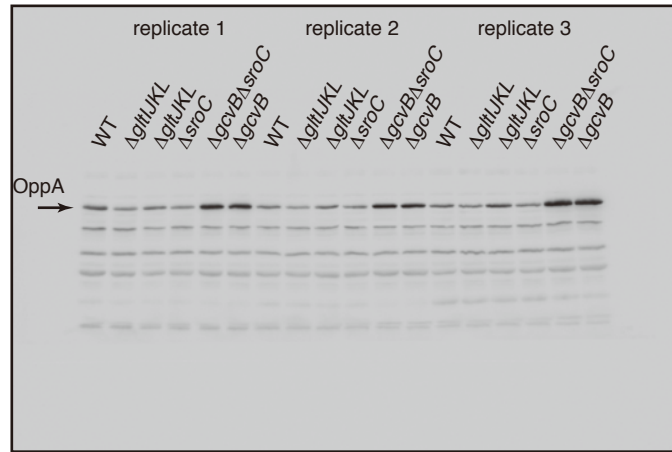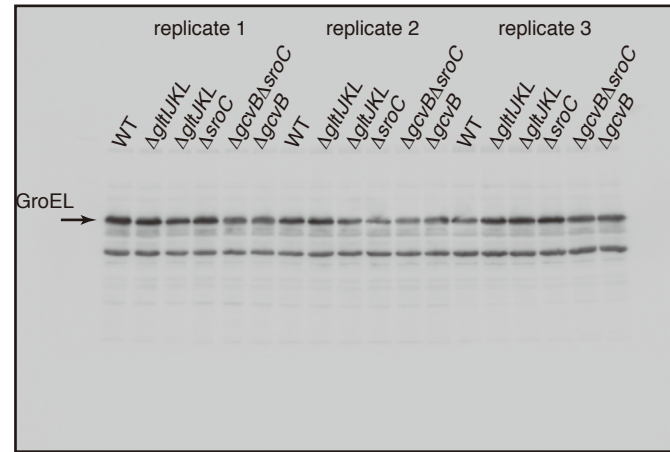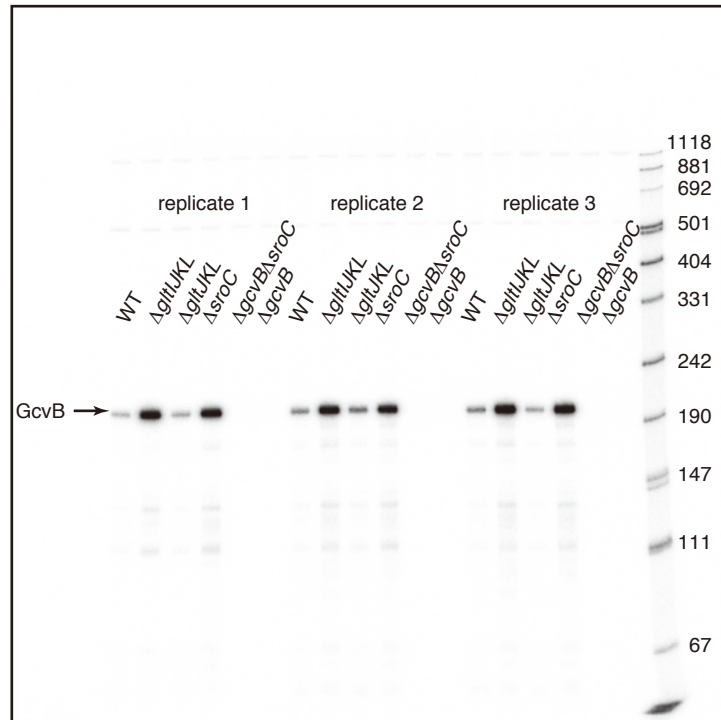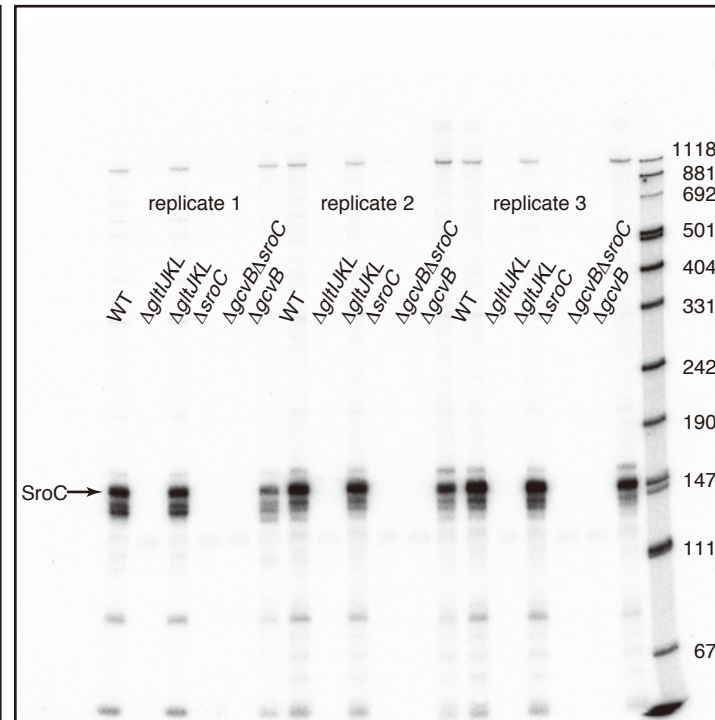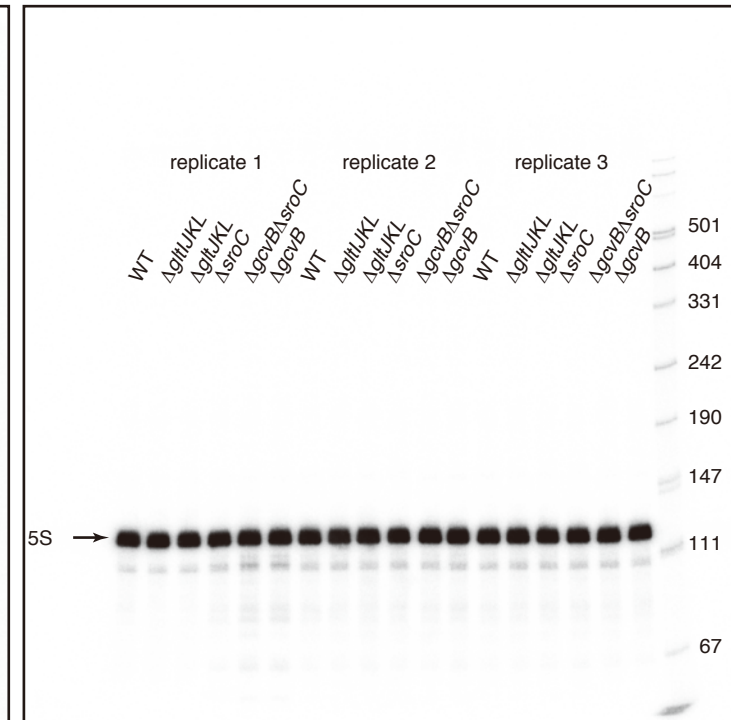

Figure 2B

Miyakoshi et al., 2014

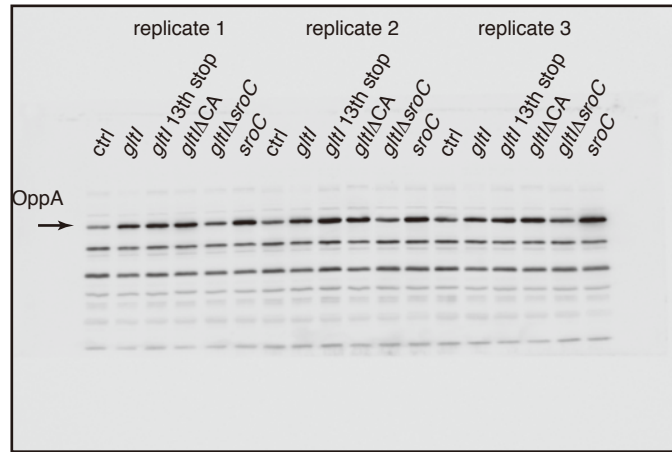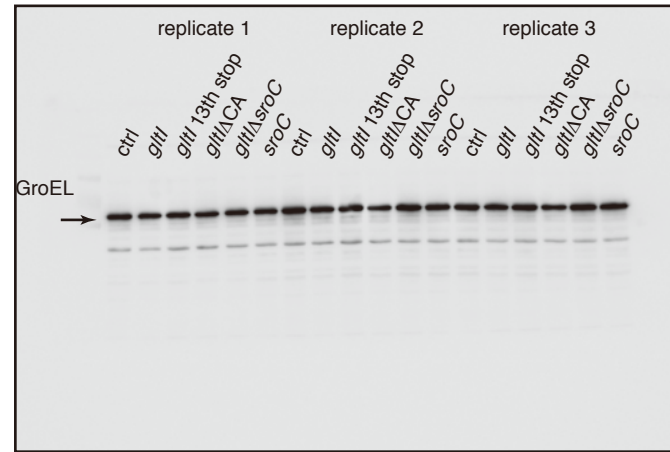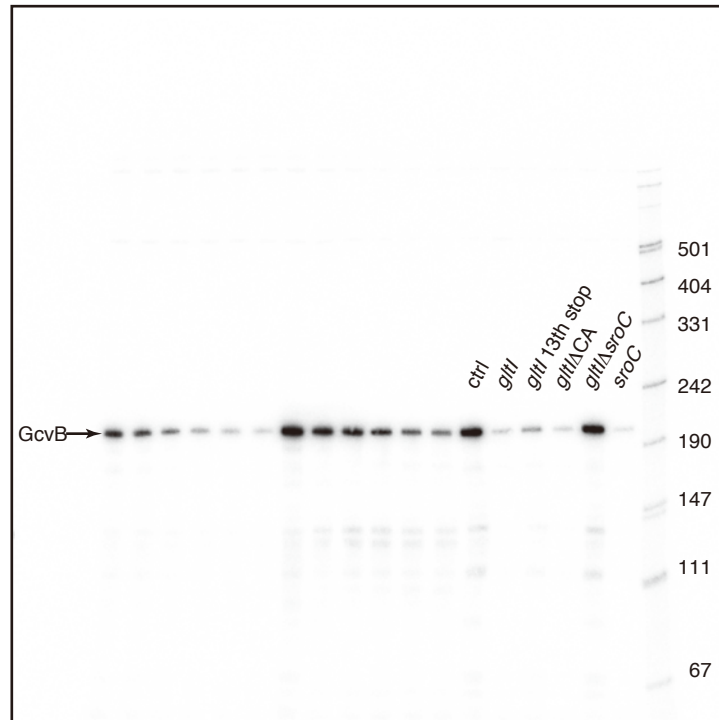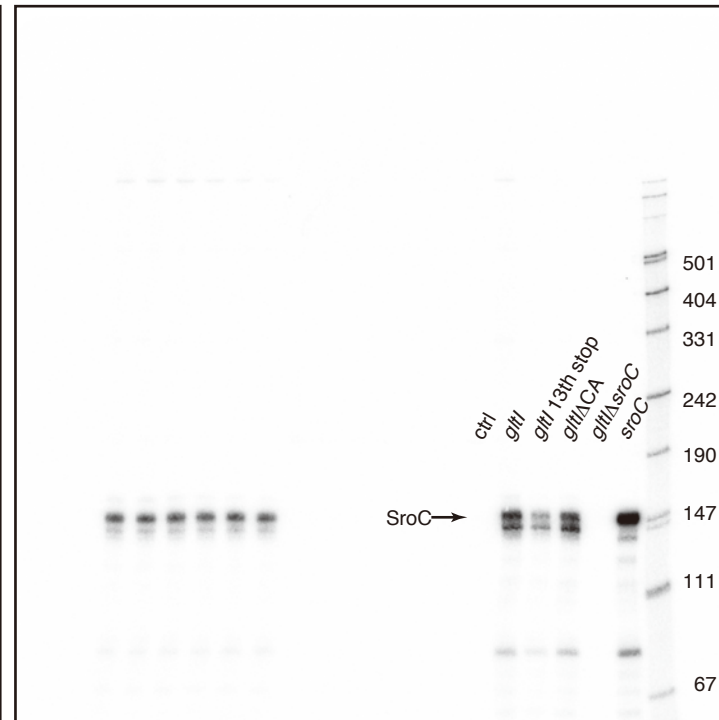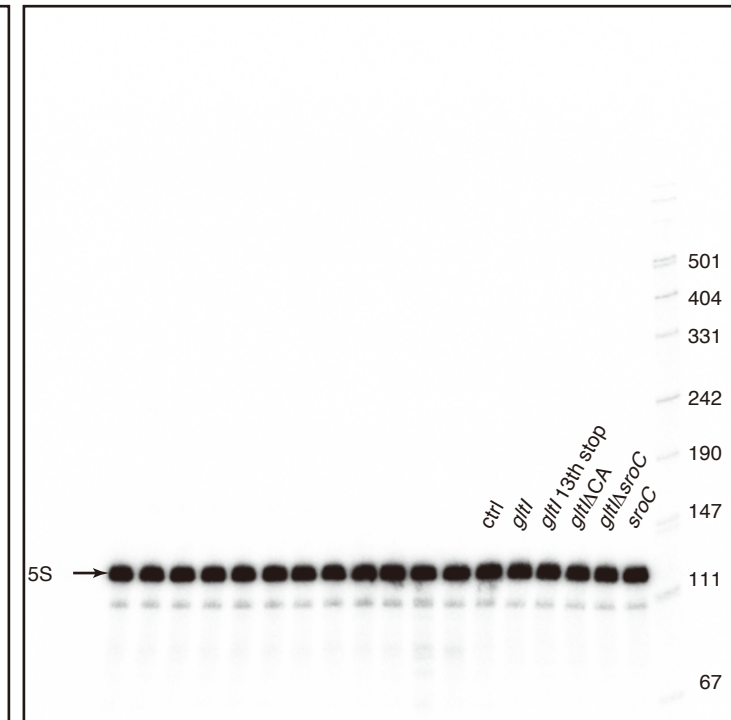

Supplement: embj0034-1478-sd3.pdf [file embj0034-1478-sd3.pdf]

Figure 3A

Miyakoshi et al., 2014

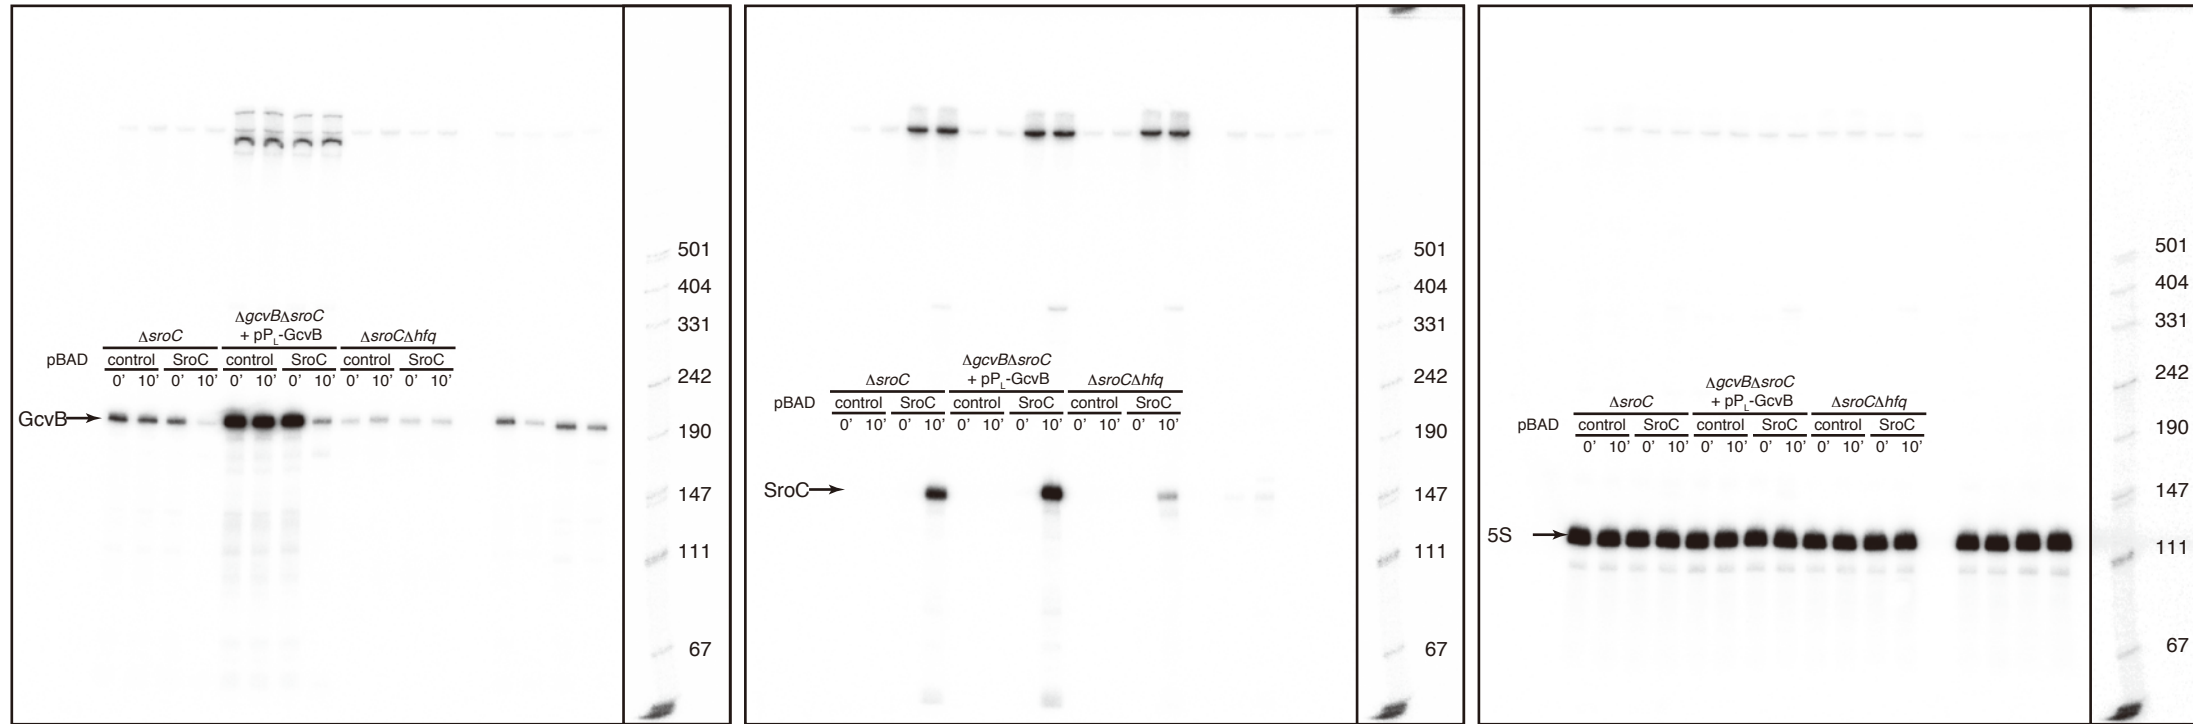

Figure 3B Miyakoshi et al., 2014

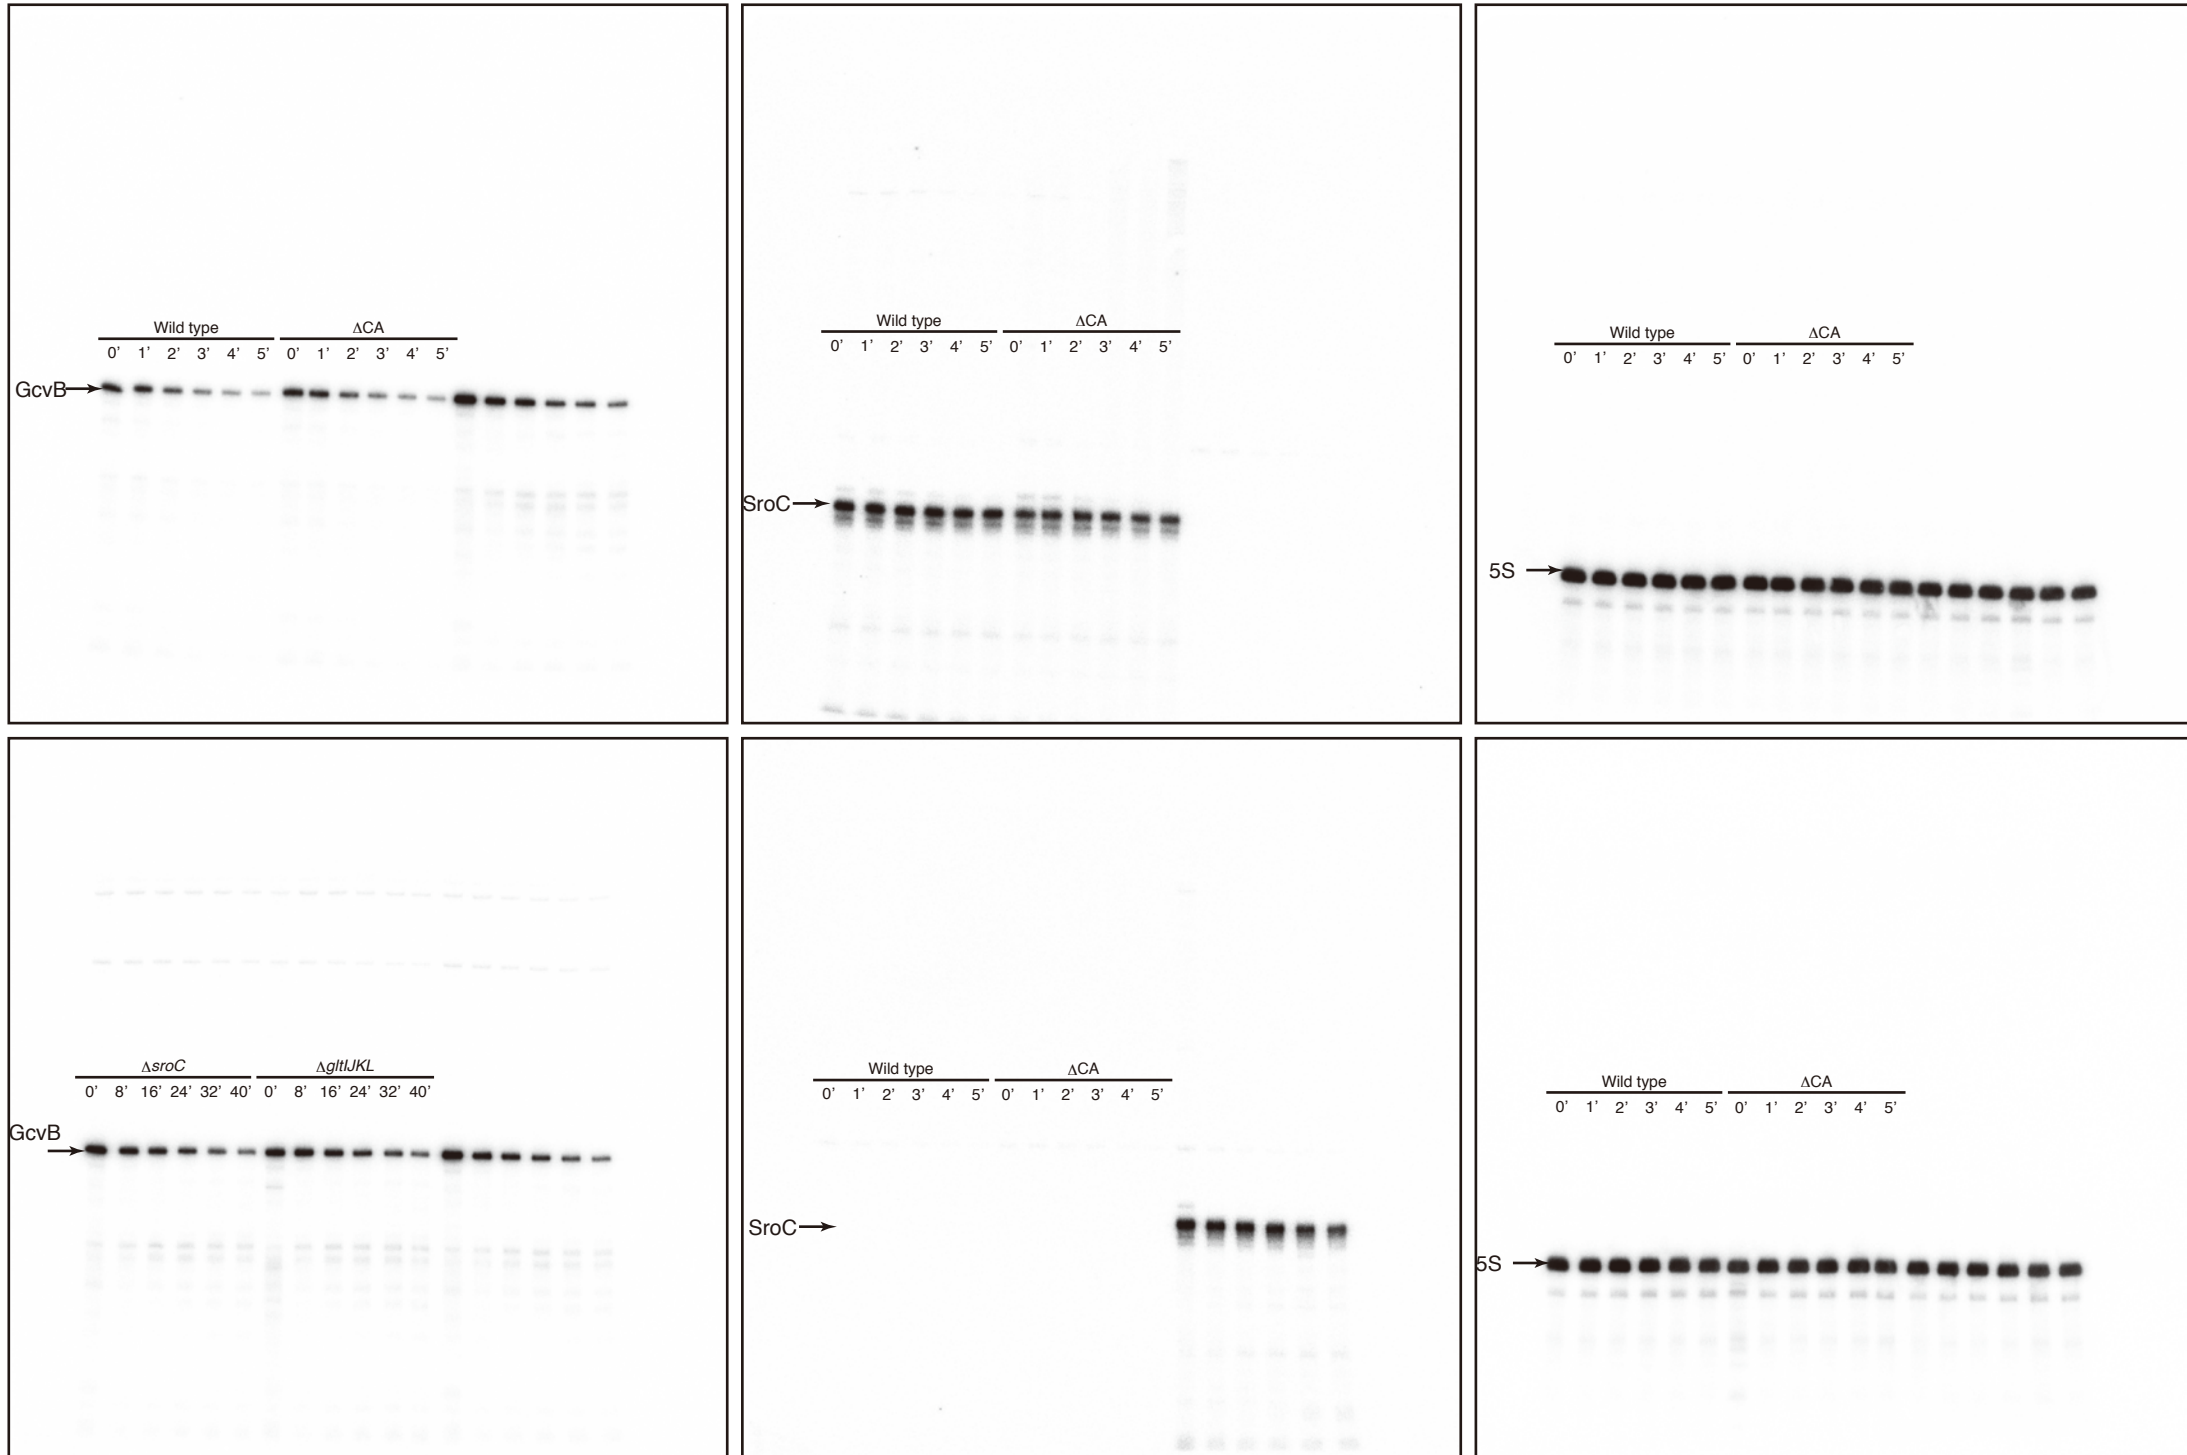

Supplement: embj0034-1478-sd4.pdf [file embj0034-1478-sd4.pdf]

Figure 4A Miyakoshi et al., 2014

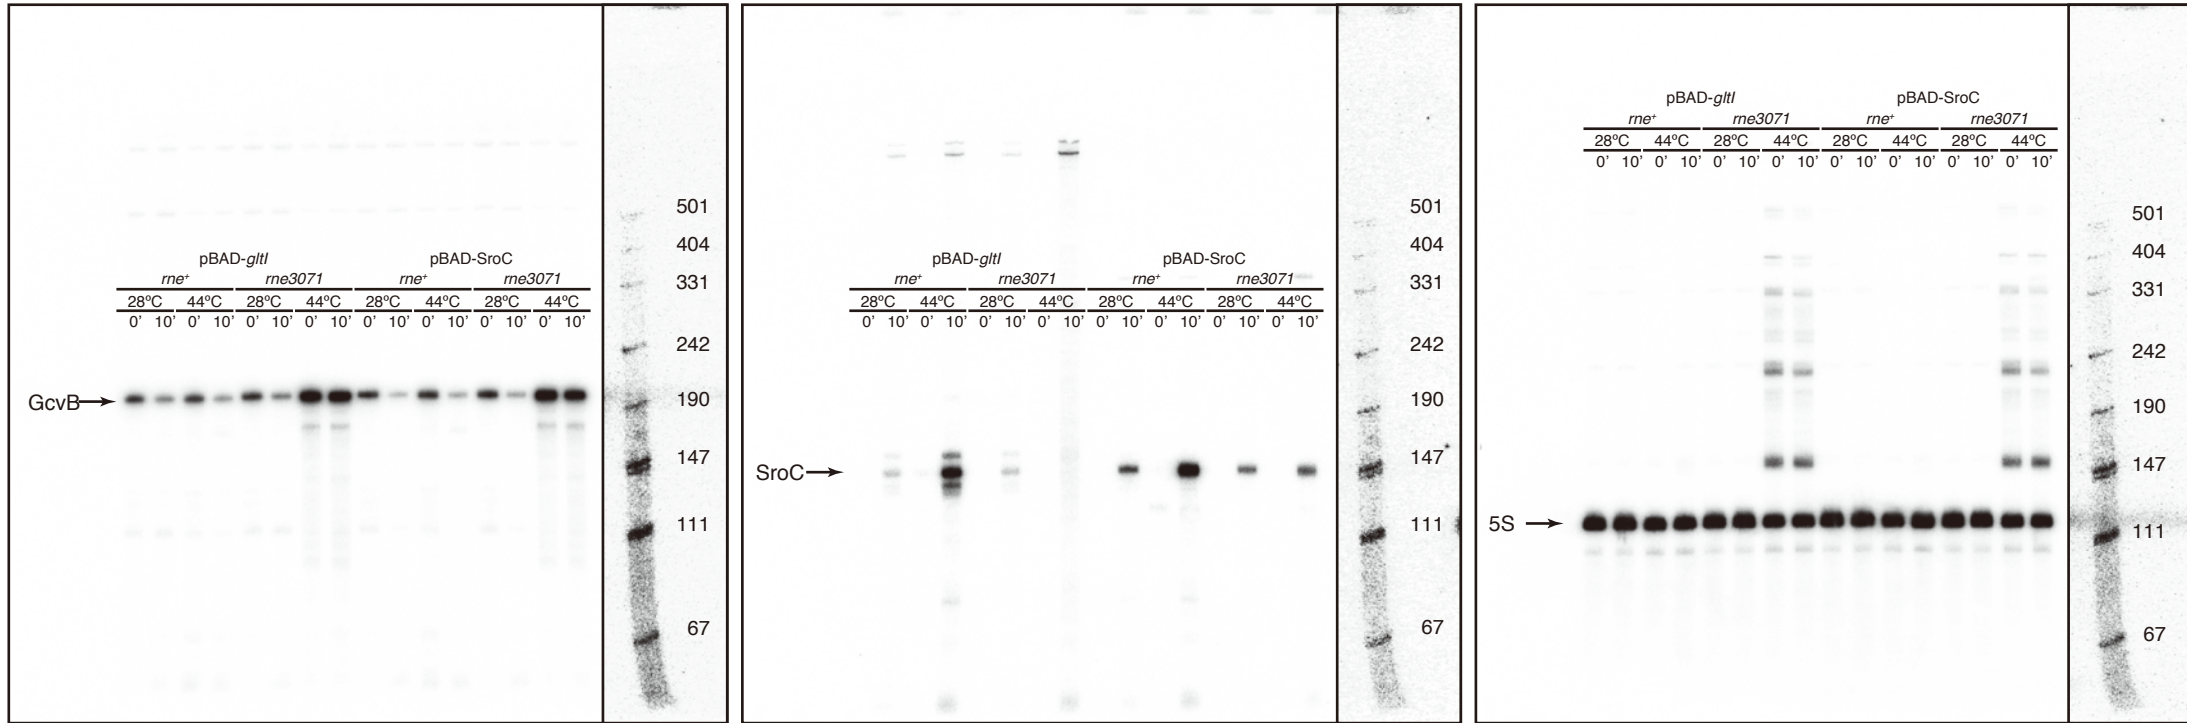

Figure 4B

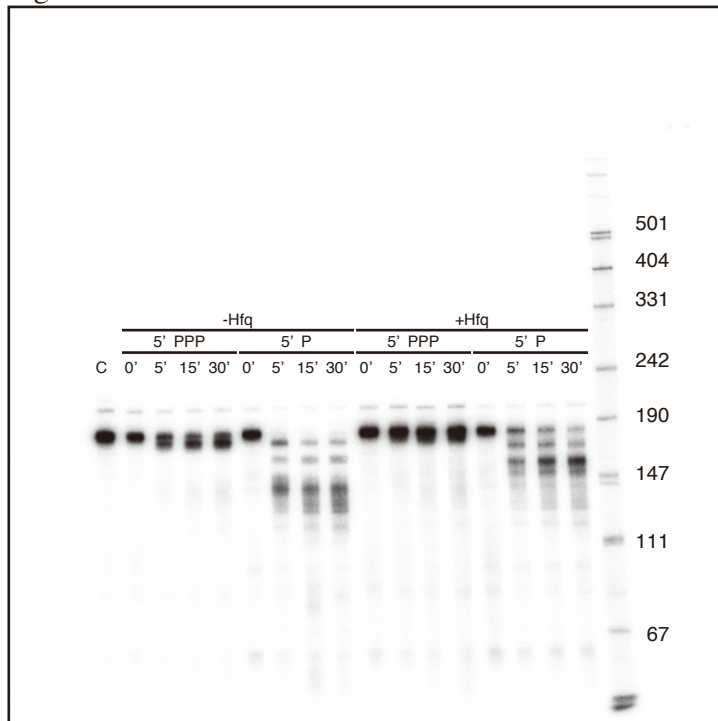

Figure 4C

Miyakoshi et al., 2014

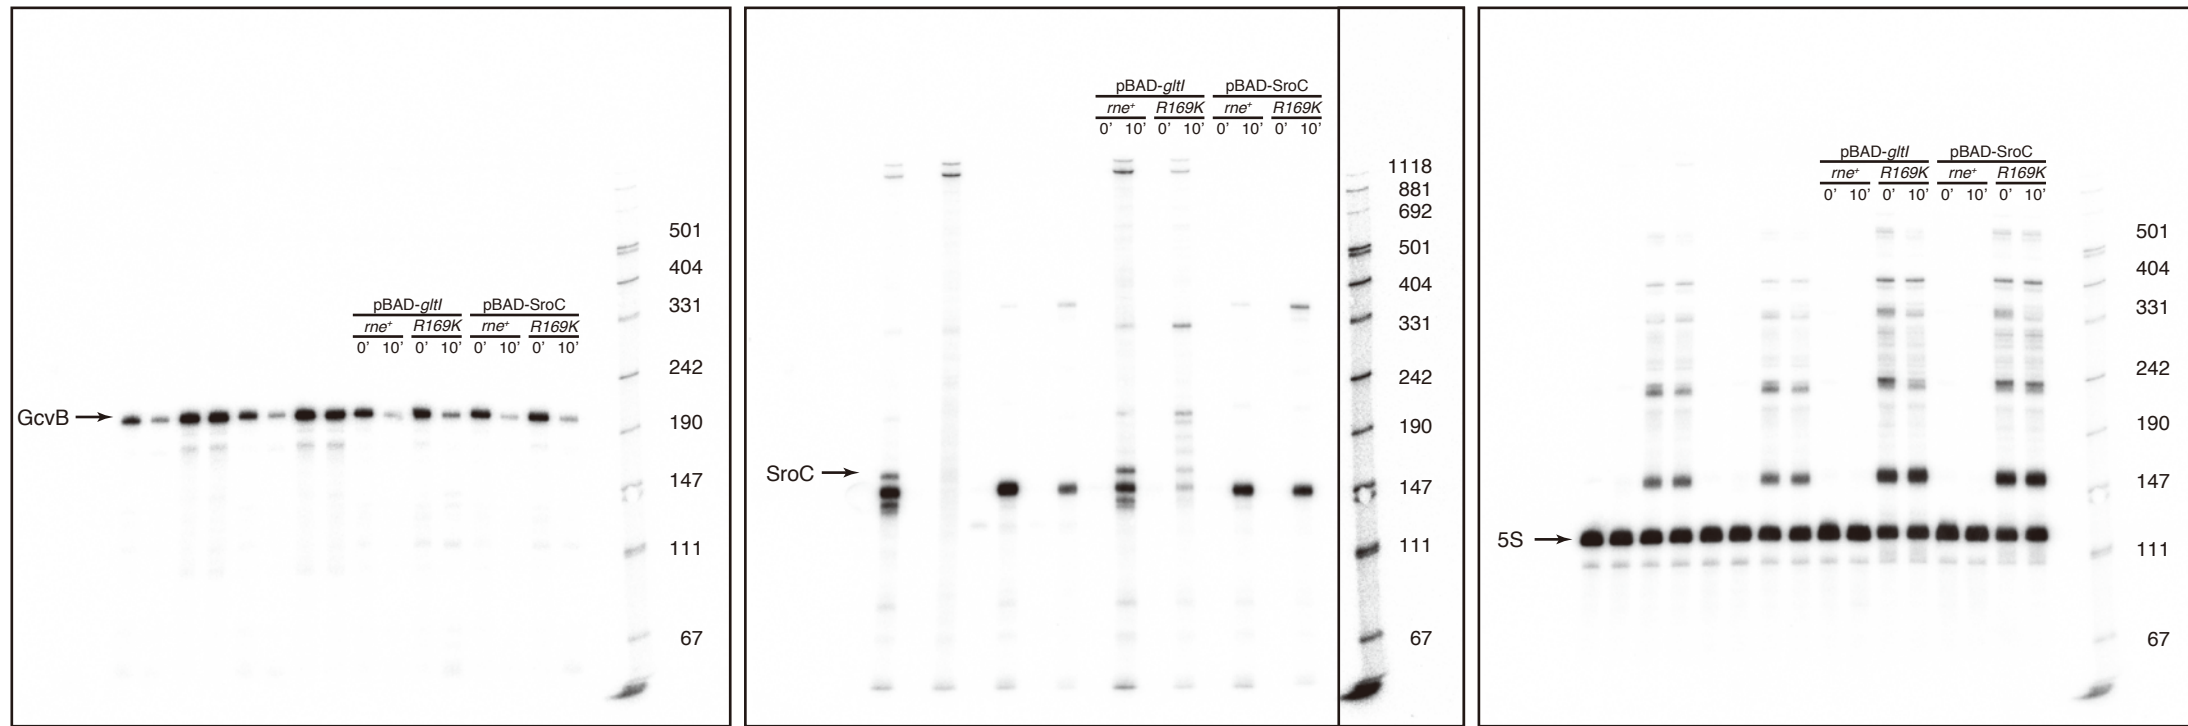

Supplement: embj0034-1478-sd5.pdf [file embj0034-1478-sd5.pdf]

Figure 6C Miyakoshi et al., 2014

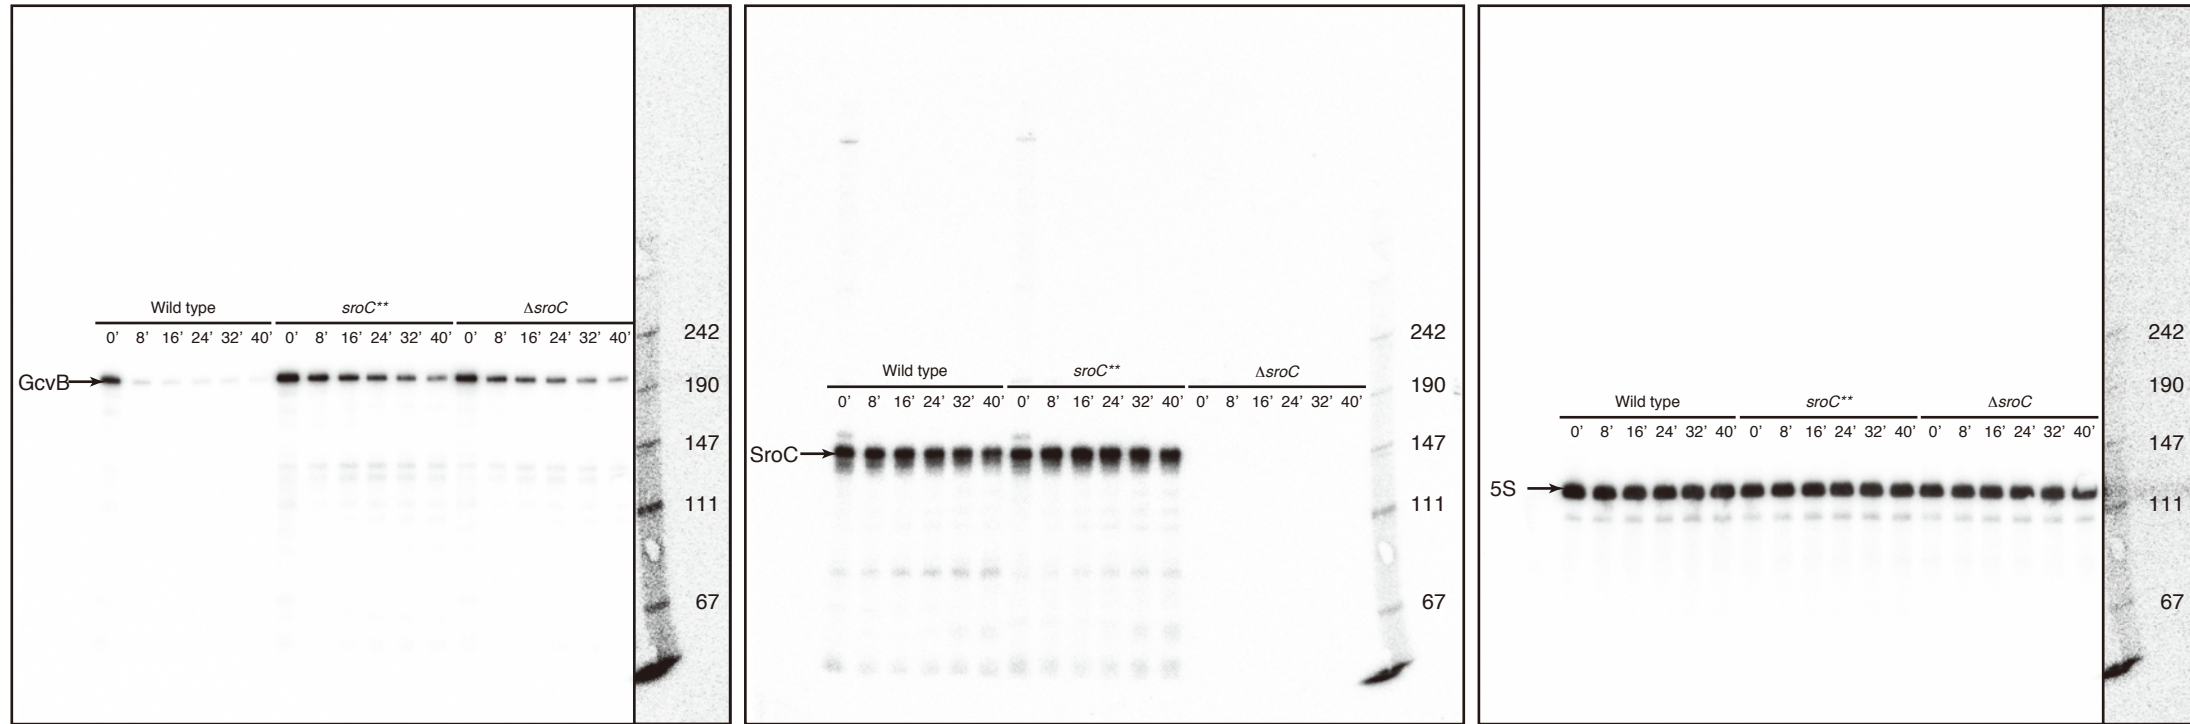

Supplement: embj0034-1478-sd7.pdf [file embj0034-1478-sd7.pdf]
